# Supplementary material
Source: PubMed Central journal article supplement (PMC3176584)
Supplement: NIHMS299847-supplement-Appendix.pdf [file NIHMS299847-supplement-Appendix.pdf]

## Outcomes with Concurrent Use of Clopidogrel and Proton-Pump Inhibitors: On-Line Appendix

This on-line appendix provides supplementary tabular and graphic material. It includes both more in-depth information for the cohort assembly and statistical analysis as well as more details for study results. It should only be read in conjunction with the primary manuscript, which describes the study methods and presents the main findings.

### Cohort Assembly

*Figure A-1* shows the study flow diagram, indicating how the clopidogrel users included in the study analysis were identified. During the study period, there were 26,315 potentially eligible clopidogrel users. Of these, 4859 (18%) were ineligible, primarily because of a prior exclusion illness. Of the remaining, 860 had no qualifying study follow-up (PPI use other than current use or nonuse).

### Statistical Analysis: Propensity Score

The primary method used to control for confounding by baseline cohort characteristics is the propensity score, defined as the baseline probability of proton-pump inhibitor (PPI) use, given a particular pattern of baseline covariates. Inclusion of the propensity score in regression models relating PPI use to study endpoints can control for confounding by the covariates included in the propensity score. Given that the true propensity score is unknown and the analysis uses an estimated propensity score, several checks are appropriate.

The propensity score was estimated using a logistic regression model, where the dependent variable was 1 for baseline PPI users and 0 for nonusers. The model was simple logit-linear, with a linear term for each covariate. *Table A-1* shows the baseline covariates considered and the odds ratios associated with each. Some of the key covariates that indicated high likelihood of baseline PPI use were calendar year (probably reflecting a secular trend of increasing PPI use), indicators of baseline upper gastrointestinal disease (the indication for PPIs), and indicators of frequent use of medical care (either prescriptions for medications for symptoms, such as benzodiazepines or outpatient physician visits).

One test of the adequacy of the model used to estimate the propensity score is whether or not there is balance in the constituent covariates between the user and nonuser groups after controlling for the propensity score. In this study, *Table 1* (primary manuscript) shows the p-values comparing the two groups after controlling for propensity score, all of these are far removed from statistical significance, indicating good balance.

Another important assumption for propensity score methods is that every cohort member has a non-zero probability of being either a PPI user or nonuser. If there are cohort members who must always receive a PPI or those who could never receive a PPI, they would be excluded, because the relevant comparison is between persons who are eligible to receive a PPI but who may or may not actually get one. We test this assumption by reviewing the overlap in the distribution of the propensity score in PPI users and nonusers. Although, as expected and as in shown in *Figure A-2*, this distribution differed for users and non-users, there was nearly complete overlap. For users and nonusers, the respective ranges of the propensity score were [.036,.997], and [.029,.983].

The study analysis controls for baseline covariates by including the propensity score deciles in the regression models. The resulting incidence rate-ratio (IRR, the study measure of effect) for PPI use is a weighted average of the within-decile IRRs. Thus it is appropriate to examine the within-decile IRRs to determine if there is interaction with the propensity score; *Table A-2* suggests there is little evidence for material interaction for either the gastroduodenal bleeding hospitalization or serious cardiovascular disease endpoints.

Another check was comparison of a model with all of the covariates to one with the propensity score deciles. This model was run for the serious cardiovascular disease endpoint, given that the expected effect of a PPI was small and thus this analysis would be most sensitive to errors in the underlying assumptions. The IRR estimates from the two models were identical, to two decimal places.

### **Statistical Analysis: Hospital Exchangeability Assumption**

The cohort is formed of persons who have a qualifying hospital stay during which they are treated for cardiovascular disease. Let the hospital from which a patient was discharged just prior to  $t_0$  be denoted as the *qualifying hospital*. Thus, it is possible that the cohort actually consists of "clusters" of patients, each consisting of patients discharged from the same qualifying hospital at  $t_0$ . If so, patients within a cluster might be more similar with respect to likelihood of an endpoint than are patients in different clusters. This is the basis for our primary analysis using a robust variance estimator that allows for within-hospital correlation.

However, for the gastroduodenal bleeding hospitalization endpoint, there are many qualifying hospitals for which there are no endpoints for either the PPI user or nonuser groups. If there is a strong clustering effect, then the analysis requires a strong exchangeability assumption, that is, that patients from one small qualifying hospital are similar to patients from another small qualifying hospital.

*Table A-3* provides information on the number of such small qualifying hospitals. The cohort is classified into tertiles according to the size of the qualifying hospital. In the top tertile, the exchangeability assumption is not an issue, every qualifying hospital has gastroduodenal endpoints for both PPI users and nonusers. Of the 9 hospitals in the middle tertile, 2 had no endpoints for the PPI user group and of the 119 in the lower tertile, 103 (86.6%) have no endpoints for the PPI user group.

However, there are two lines of evidence that suggest findings are robust. First is the clinical plausibility of a strong clustering effect. The median length of stay for the qualifying hospitalization is 3 days. The gastroduodenal endpoints occur a median of 328 days following the qualifying hospital discharge. The patients are seen during the qualifying hospitalization for coronary artery disease. Thus, for example, a major effect of hospital factors related to a 3 day hospital stay with stenting for angina on a bleed that occurs 11 months later seems unlikely.

Second, analysis by tertiles according to qualifying hospital cohort patient volume shows no evidence of variation by this factor (*Table A-3*).

### **Statistical Analysis: Time-Dependent Covariates, Model Fitting Results**

The propensity scores included in all models were constructed from the value of study variables at  $t_0$  and thus wouldn't account for changes in these factors. For this reason, all models included additional time-dependent covariates, using traditional regression methods. This raises the possibility of introduction of multicollinearity and adjustment for factors on the causal pathway. The robustness of the analysis to violations of these assumptions is explored in alternative analyses that exclude time-dependent covariates.

*Table A-4* presents the primary regression model for the gastroduodenal bleeding hospitalization endpoint. As expected, the baseline propensity score is a good predictor for this endpoint, given that the factors associated with PPI use should identify patients at higher risk of subsequent upper gastrointestinal bleeding. With regard to the time-dependent covariates, important variables are medications known to increase the risk of bleeding, such as oral anticoagulants, NSAIDs, and low-dose aspirin, as well as indicators of general medical comorbidity.

*Table A-5* presents the primary regression model for the serious cardiovascular disease endpoint. In contrast to the model for the bleeding endpoint, baseline propensity score is not a good predictor of future

cardiovascular endpoints. This is evidence that there is not a strong overlap between risk factors for upper gastrointestinal disease and those for cardiovascular disease. In contrast, the type of qualifying hospitalization is a strong predictor, with the greatest risk being for patients who had an acute myocardial infarction, but no revascularization procedures. The time-dependent covariates for new drugs and new diagnoses were chosen as those that were good predictors of baseline prognosis (statistical significance [ $p < .01$ ] in a proportional hazards regression that included all of the variables in the Appendix with a baseline hazard ratio  $> 1.10$  or  $< 0.90$ ).

### **Study Results: Further Details**

*Figure A-3* presents the risk of gastroduodenal bleeding hospitalizations according to number of risk factors for such bleeding, demonstrating that the absolute risk increases with the number of such factors and that the absolute benefit associated with current PPI use is greatest for high-risk patients.

*Table A-6* and *Figure A-4* present further information for the serious cardiovascular disease endpoint for patients whose qualifying hospital stay included percutaneous coronary intervention with stenting. This group is of particular interest because of the importance of antiplatelet therapy to prevent stent occlusion. There was no increased risk of serious cardiovascular disease associated with current PPI use (*Table A-4*). For the year following stent implantation, the period during which clopidogrel use is thought to be most important to prevent thrombotic events, the cumulative incidence of serious cardiovascular disease was virtually identical for current PPI users and nonusers.

*Tables A-7* and *A-8* include sensitivity analyses that assesses the effects of several study assumptions, including the use of time-dependent covariates. They suggest study findings are robust. Similarly, findings are not materially altered if study definitions are modified to make our study more comparable to another recent study.

**Table A-1. Variables used to calculate propensity score. Shown are the odds ratio from the logistic regression model, the 95% confidence interval, and the p-value.**

| Parameter                                       | Odds Ratio | 95% confidence interval |         | P-value |
|-------------------------------------------------|------------|-------------------------|---------|---------|
| 1 Intercept                                     | 0.25533    | 0.15168                 | 0.42979 | <.0001  |
| 2 Age, one year increase                        | 1.00114    | 0.99757                 | 1.00471 | 0.5328  |
| 3 Sex, male vs female                           | 0.96304    | 0.89765                 | 1.03319 | 0.2938  |
| 4 Calendar year, 1999                           | 0.2885     | 0.24324                 | 0.34217 | <.0001  |
| 5 Calendar year, 2000                           | 0.34714    | 0.29536                 | 0.408   | <.0001  |
| 6 Calendar year, 2001                           | 0.58054    | 0.50004                 | 0.674   | <.0001  |
| 7 Calendar year, 2002                           | 0.77958    | 0.67621                 | 0.89874 | 0.0006  |
| 8 Calendar year, 2003                           | 1.03826    | 0.90925                 | 1.18559 | 0.5791  |
| 9 Calendar year, 2004                           | 1.08946    | 0.96462                 | 1.23046 | 0.1676  |
| 10 Race, White vs not White                     | 1.04624    | 0.96343                 | 1.13616 | 0.2826  |
| 11 Medicaid enrollment, uninsured vs other      | 0.93019    | 0.86352                 | 1.00201 | 0.0565  |
| 12 Qualifying hosp stay, no AMI, no revasc      | 1.06133    | 0.83785                 | 1.34441 | 0.6217  |
| 13 Qualifying hosp stay, no AMI, Stent NDE      | 0.8175     | 0.65155                 | 1.02573 | 0.0818  |
| 14 Qualifying hosp stay, no AMI, Stent DE       | 0.86628    | 0.68061                 | 1.10259 | 0.2434  |
| 15 Qualifying hosp stay, no AMI, CABG           | 0.98119    | 0.77957                 | 1.23496 | 0.8715  |
| 16 Qualifying hosp stay, AMI, no PCI            | 1.04405    | 0.82544                 | 1.32054 | 0.7192  |
| 17 Qualifying hosp stay, AMI+Stent NDE          | 0.87511    | 0.69385                 | 1.10374 | 0.26    |
| 18 Qualifying hosp stay, AMI+Stent DE           | 0.92056    | 0.70356                 | 1.20448 | 0.5462  |
| 19 Prior esophageal disease hospitalization     | 4.18552    | 3.8206                  | 4.5853  | <.0001  |
| 20 GI bleeding complication                     | 1.35168    | 1.01596                 | 1.79833 | 0.0386  |
| 21 Other bleeding complication                  | 0.90205    | 0.72556                 | 1.12147 | 0.3534  |
| 22 Peptic ulcer hospitalization                 | 2.15537    | 1.69805                 | 2.73587 | <.0001  |
| 23 Gastritis                                    | 2.03045    | 1.60513                 | 2.56846 | <.0001  |
| 24 Other upper GI disease, inpatient            | 1.65845    | 1.27184                 | 2.16259 | 0.0002  |
| 25 Prior lower gastrointestinal hospitalization | 1.07647    | 0.92757                 | 1.24928 | 0.332   |
| 26 Prior GI symptoms hospitalization            | 1.17923    | 1.05875                 | 1.31342 | 0.0027  |
| 27 Helicobacter pylori eradication treatment    | 4.04315    | 2.97682                 | 5.49144 | <.0001  |
| 28 Any prior histamine2 receptor antagonist     | 0.80752    | 0.7512                  | 0.86806 | <.0001  |
| 29 Sucralfate                                   | 3.10307    | 2.2801                  | 4.22308 | <.0001  |
| 30 Misoprostol                                  | 1.53222    | 1.09375                 | 2.14647 | 0.0131  |
| 31 Antacid                                      | 1.25678    | 1.03982                 | 1.51901 | 0.0181  |
| 32 Prior NSAID                                  | 0.93418    | 0.85085                 | 1.02567 | 0.1532  |
| 33 Prior coxib                                  | 1.48148    | 1.36705                 | 1.6055  | <.0001  |
| 34 Systemic corticosteroid                      | 1.19743    | 1.10921                 | 1.29266 | <.0001  |
| 35 Dipyridamole                                 | 1.11042    | 0.88801                 | 1.38852 | 0.3584  |
| 36 Diagnosed obesity                            | 0.89836    | 0.81122                 | 0.99486 | 0.0395  |
| 37 Diagnosed history tobacco use                | 0.88244    | 0.81999                 | 0.94963 | 0.0008  |
| 38 ACE inhibitor                                | 0.95619    | 0.89044                 | 1.02679 | 0.2177  |
| 39 Angiotensin receptor blocker                 | 1.05583    | 0.95657                 | 1.16538 | 0.2808  |
| 40 Anticoagulant                                | 0.95913    | 0.86208                 | 1.06711 | 0.4433  |
| 41 Anti-arrhythmic                              | 0.98396    | 0.87191                 | 1.11041 | 0.7932  |
| 42 Low dose aspirin                             | 1.12208    | 1.02813                 | 1.2246  | 0.0098  |
| 43 Beta-blocker                                 | 1.02922    | 0.9582                  | 1.10551 | 0.4298  |
| 44 Calcium-channel blocker                      | 1.00619    | 0.93867                 | 1.07856 | 0.8618  |
| 45 Digoxin                                      | 0.93709    | 0.84147                 | 1.04358 | 0.2368  |
| 46 Loop diuretic                                | 1.04478    | 0.96501                 | 1.13115 | 0.2797  |
| 47 Other diuretic                               | 1.09363    | 1.01706                 | 1.17597 | 0.0157  |
| 48 Insulin                                      | 1.11936    | 1.00773                 | 1.24335 | 0.0354  |
| 49 Oral hypoglycemic                            | 1.08788    | 0.97318                 | 1.21611 | 0.1384  |
| 50 Statin                                       | 1.08113    | 1.00102                 | 1.16766 | 0.0471  |
| 51 Fibrate                                      | 1.2107     | 1.11128                 | 1.31901 | <.0001  |
| 52 Nitrate                                      | 1.10612    | 1.02773                 | 1.19049 | 0.0072  |
| 53 Other antihypertensive                       | 0.96081    | 0.87163                 | 1.05912 | 0.4212  |
| 54 Vasodilator                                  | 0.99613    | 0.80728                 | 1.22916 | 0.9712  |

|     |                                               |         |         |         |        |
|-----|-----------------------------------------------|---------|---------|---------|--------|
| 55  | Other platelet inhibitor                      | 0.78915 | 0.72837 | 0.855   | <.0001 |
| 56  | Angina before qual hosp                       | 1.01375 | 0.93465 | 1.09954 | 0.7419 |
| 57  | Valve disorder before qual hosp               | 0.90069 | 0.79983 | 1.01426 | 0.0843 |
| 58  | Conduction disorder before qual hosp          | 0.89837 | 0.73001 | 1.10555 | 0.3114 |
| 59  | Arrhythmia before qual hosp                   | 1.07872 | 0.97268 | 1.19632 | 0.1512 |
| 60  | Pacemaker before qual hosp                    | 1.21561 | 0.84749 | 1.74363 | 0.2888 |
| 61  | Heart failure before qual hosp                | 0.99085 | 0.89336 | 1.09898 | 0.8619 |
| 62  | Stroke before qual hosp                       | 0.89912 | 0.81055 | 0.99737 | 0.0445 |
| 63  | Cerebrovascular disease before qual hosp      | 0.96727 | 0.81077 | 1.15398 | 0.7117 |
| 64  | Peripheral vascular disease before qual hosp  | 1.05806 | 0.94492 | 1.18475 | 0.328  |
| 65  | Diabetes before qual hosp                     | 0.96238 | 0.8513  | 1.08795 | 0.54   |
| 66  | Hypertension before qual hosp                 | 1.03293 | 0.94631 | 1.12747 | 0.4685 |
| 67  | Lipid disorder before qual hosp               | 1.05212 | 0.9752  | 1.1351  | 0.1896 |
| 68  | Renal disorder before qual hosp               | 0.94974 | 0.7988  | 1.1292  | 0.5593 |
| 69  | Other cardiovascular disease before qual hosp | 1.03858 | 0.9575  | 1.12654 | 0.3614 |
| 70  | Cardiovascular symptoms before qual hosp      | 1.22794 | 1.13862 | 1.32427 | <.0001 |
| 71  | Angina during qual hosp                       | 1.07511 | 0.99487 | 1.16184 | 0.0673 |
| 72  | Valve disorder during qual hosp               | 1.0227  | 0.9109  | 1.14822 | 0.7039 |
| 73  | Conduction disorder during qual hosp          | 1.02128 | 0.86997 | 1.1989  | 0.7969 |
| 74  | Arrhythmia during qual hosp                   | 0.88219 | 0.80575 | 0.96589 | 0.0067 |
| 75  | Pacemaker during qual hosp                    | 1.08362 | 0.82253 | 1.42759 | 0.568  |
| 76  | Heart failure during qual hosp                | 0.96883 | 0.87765 | 1.06948 | 0.53   |
| 77  | Stroke during qual hosp                       | 0.82699 | 0.71259 | 0.95976 | 0.0124 |
| 78  | Cerebrovascular disease during qual hosp      | 0.93737 | 0.74515 | 1.17919 | 0.5807 |
| 79  | Peripheral vascular disease during qual hosp  | 0.89012 | 0.78485 | 1.00951 | 0.0699 |
| 80  | Diabetes during qual hosp                     | 0.84786 | 0.75847 | 0.94779 | 0.0037 |
| 81  | Hypertension during qual hosp                 | 0.99961 | 0.92601 | 1.07907 | 0.9921 |
| 82  | Lipid disorder during qual hosp               | 0.87485 | 0.81371 | 0.94058 | 0.0003 |
| 83  | Renal disorder during qual hosp               | 1.28125 | 1.0731  | 1.52977 | 0.0061 |
| 84  | Other cardiovascular disease during qual hosp | 1.02232 | 0.92052 | 1.13539 | 0.6799 |
| 85  | Cardiovascular symptoms during qual hosp      | 1.03001 | 0.95931 | 1.10592 | 0.4151 |
| 86  | Prior fall related injury                     | 0.92805 | 0.82214 | 1.04761 | 0.2272 |
| 87  | Prior impairment of mobility                  | 1.1766  | 0.92375 | 1.49867 | 0.1877 |
| 88  | Prior use home oxygen                         | 0.88413 | 0.70006 | 1.11659 | 0.3011 |
| 89  | Prior neurologic disease                      | 0.92626 | 0.71364 | 1.20221 | 0.5648 |
| 90  | Prior mental illness                          | 0.87355 | 0.79698 | 0.95748 | 0.0039 |
| 91  | Prior COPD                                    | 0.98729 | 0.9102  | 1.07091 | 0.7578 |
| 92  | Prior antidepressant                          | 1.25477 | 1.16743 | 1.34865 | <.0001 |
| 93  | Prior benzodiazepine/GABA agonist             | 1.32415 | 1.23379 | 1.42113 | <.0001 |
| 94  | Prior antipsychotic                           | 0.92795 | 0.8125  | 1.0598  | 0.27   |
| 95  | Prior ADHD medication                         | 0.9821  | 0.67753 | 1.42358 | 0.924  |
| 96  | Prior anticonvulsant                          | 1.08156 | 0.98585 | 1.18656 | 0.0972 |
| 97  | Prior narcotic analgesic                      | 1.15109 | 1.06221 | 1.24741 | 0.0006 |
| 98  | Prior musculoskeletal relaxant                | 1.084   | 1.00191 | 1.17282 | 0.0447 |
| 99  | Prior antimicrobial                           | 1.17431 | 1.07873 | 1.27836 | 0.0002 |
| 100 | Prior bronchodilator                          | 1.28536 | 1.1897  | 1.38871 | <.0001 |
| 101 | Indicator, prior CV hosp: 0                   | 1.10015 | 0.93107 | 1.29994 | 0.2622 |
| 102 | Indicator, prior CV hosp: 1                   | 1.10998 | 0.95989 | 1.28355 | 0.1592 |
| 103 | Indicator, prior CV ER: 0                     | 0.97708 | 0.86534 | 1.10324 | 0.7082 |
| 104 | Indicator, prior CV ER: 1                     | 0.98323 | 0.87575 | 1.1039  | 0.7746 |
| 105 | Indicator, prior CV outpatient visits: 0      | 1.03518 | 0.88921 | 1.20511 | 0.6557 |
| 106 | Indicator, prior CV outpatient visits: 1      | 1.05889 | 0.91844 | 1.2208  | 0.4306 |
| 107 | Indicator, prior CV outpatient visits: 2      | 1.08901 | 0.9472  | 1.25207 | 0.231  |
| 108 | Indicator, prior CV outpatient visits: 3-4    | 1.07149 | 0.94731 | 1.21196 | 0.2719 |
| 109 | Indicator, prior CV outpatient visits: 5-7    | 1.13547 | 1.00507 | 1.28279 | 0.0412 |
| 110 | Indicator, prior non-CV ER: 0                 | 0.93475 | 0.83868 | 1.04183 | 0.2227 |
| 111 | Indicator, prior non-CV ER: 1                 | 0.91548 | 0.81458 | 1.02886 | 0.1382 |
| 112 | Indicator, prior non-CV hosp: 0               | 1.34805 | 1.0483  | 1.73351 | 0.0199 |
| 113 | Indicator, prior non-CV hosp: 1               | 1.32725 | 1.00975 | 1.74459 | 0.0424 |
| 114 | Indicator, prior non-CV outpatient visits: 0  | 0.64105 | 0.53549 | 0.76743 | <.0001 |
| 115 | Indicator, prior non-CV outpatient visits: 1  | 0.4902  | 0.40668 | 0.59088 | <.0001 |
| 116 | Indicator, prior non-CV outpatient visits: 2  | 0.56954 | 0.47533 | 0.68242 | <.0001 |

|     |                                                  |         |         |         |        |
|-----|--------------------------------------------------|---------|---------|---------|--------|
| 117 | Indicator, prior non-CV outpatient visits: 3-4   | 0.58455 | 0.50947 | 0.6707  | <.0001 |
| 118 | Indicator, prior non-CV outpatient visits: 5-9   | 0.67385 | 0.60603 | 0.74926 | <.0001 |
| 119 | Indicator, prior non-CV outpatient visits: 10-19 | 0.77217 | 0.70148 | 0.84999 | <.0001 |
| 120 | Any hospital stay 30 days preceding qual admit   | 0.98928 | 0.87686 | 1.11611 | 0.8609 |
| 121 | More than 7 inpatient days prior to te           | 0.92603 | 0.80184 | 1.06945 | 0.2956 |
| 122 | Clopidogrel/ticlopidene prior to te              | 1.15245 | 1.04739 | 1.26804 | 0.0036 |
| 123 | Qualifying event hospital stay days              | 1.01873 | 1.00981 | 1.02773 | <.0001 |

**Table A-2. Study findings according to propensity score deciles.**

| Propensity score decile | Gastroduodenal Bleeding Endpoint |                           |                         |           | Serious Cardiovascular Disease Endpoint |                                   |                         |           |
|-------------------------|----------------------------------|---------------------------|-------------------------|-----------|-----------------------------------------|-----------------------------------|-------------------------|-----------|
|                         | Person-years                     | Gastro-duodenal bleeds, N | HR: PPI user vs nonuser | 95% CI    | Person-years                            | Serious cardiovascular disease, N | HR: PPI user vs nonuser | 95% CI    |
| 1                       | 1738                             | 14                        | 0.64                    | 0.24-1.73 | 1539                                    | 91                                | 0.99                    | 0.58-1.69 |
| 2                       | 1889                             | 20                        | 0.37                    | 0.15-0.91 | 1739                                    | 107                               | 1.02                    | 0.66-1.56 |
| 3                       | 1940                             | 23                        | 0.26                    | 0.09-0.71 | 1793                                    | 124                               | 0.89                    | 0.58-1.35 |
| 4                       | 1995                             | 16                        | 0.72                    | 0.25-2.10 | 1841                                    | 120                               | 1.36                    | 0.90-2.06 |
| 5                       | 1771                             | 15                        | 1.48                    | 0.53-1.45 | 1676                                    | 104                               | 1.09                    | 0.75-1.60 |
| 6                       | 1786                             | 15                        | 0.80                    | 0.27-2.37 | 1708                                    | 111                               | 0.70                    | 0.46-1.08 |
| 7                       | 1671                             | 14                        | 0.50                    | 0.16-1.61 | 1590                                    | 94                                | 0.66                    | 0.43-1.01 |
| 8                       | 1585                             | 20                        | 0.19                    | 0.04-0.82 | 1517                                    | 88                                | 1.36                    | 0.93-1.99 |
| 9                       | 1531                             | 19                        | 0.73                    | 0.25-2.10 | 1458                                    | 101                               | 0.93                    | 0.60-1.46 |
| 10                      | 1403                             | 24                        | 0.00                    | undefined | 1361                                    | 101                               | 1.11                    | 0.67-1.84 |

**Table A-3. Qualifying hospital (hospital from which patient discharged just prior to  $t_0$ ) volume tertiles. Volume defined as number of cohort patients whose qualifying hospital discharge occurred at that institution. The first tertile consists of cohort patients discharged from the 4 qualifying hospitals with the largest volume, and so on. The numbers of qualifying hospitals for with no endpoints during followup is shown for all patients discharged from that hospital at  $t_0$  and for patients according to PPI use status during followup.**

| Tertile | Qualifying Hospitals |                              |             |          | Gastroduodenal (GD) Bleeding |           |                         |           |
|---------|----------------------|------------------------------|-------------|----------|------------------------------|-----------|-------------------------|-----------|
|         | N                    | N with no followup GD Bleeds |             |          | Person-years                 | GD Bleeds | HR: PPI user vs nonuser | 95% CI    |
|         |                      | All                          | PPI nonuser | PPI User |                              |           |                         |           |
| 1       | 4                    | 0                            | 0           | 0        | 5730                         | 63        | 0.49                    | 0.27-0.89 |
| 2       | 9                    | 0                            | 0           | 2        | 5771                         | 46        | 0.57                    | 0.27-1.18 |
| 3       | 119                  | 89                           | 94          | 103      | 5809                         | 71        | 0.50                    | 0.27-0.93 |

**Table A-4. Cox regression model results for gastroduodenal bleeding hospitalization endpoint. Shown are the hazard ratios (HRs), the 95% confidence intervals (CIs), and the p-value (p).**

|                                                       |                      | <i>HR</i> | <i>95% CI</i> |         | <i>p</i> |
|-------------------------------------------------------|----------------------|-----------|---------------|---------|----------|
| Age in years, mean                                    |                      | 1.0347    | 1.0223        | 1.0472  | 0.0000   |
| Male, %                                               |                      | 0.8333    | 0.6147        | 1.1298  | 0.2404   |
| Calendar year of cohort entry, mean 2005              | 2005                 | 0.9103    | 0.4216        | 1.9657  | 0.8110   |
| Calendar year of cohort entry, mean 2004              | 2004                 | 0.5474    | 0.2667        | 1.1236  | 0.1005   |
| Calendar year of cohort entry, mean 2003              | 2003                 | 0.7102    | 0.3979        | 1.2676  | 0.2470   |
| Calendar year of cohort entry, mean 2002              | 2002                 | 0.6193    | 0.3508        | 1.0932  | 0.0984   |
| Calendar year of cohort entry, mean 2001              | 2001                 | 0.4287    | 0.2489        | 0.7383  | 0.0023   |
| Calendar year of cohort entry, mean 2000              | 2000                 | 0.7843    | 0.4577        | 1.3440  | 0.3766   |
| White, %                                              |                      | 1.0381    | 0.7908        | 1.3626  | 0.7878   |
| TennCare enrollment uninsured, %                      |                      | 0.8192    | 0.5382        | 1.2471  | 0.3523   |
| Qualifying hospitalization AMI 1                      | 1                    | 1.0554    | 0.7869        | 1.4154  | 0.7189   |
| Propensity score for baseline PPI use, deciles 9      | 9                    | 2.4952    | 1.1417        | 5.4531  | 0.0219   |
| Propensity score for baseline PPI use, deciles 8      | 8                    | 1.6091    | 0.6650        | 3.8934  | 0.2913   |
| Propensity score for baseline PPI use, deciles 7      | 7                    | 1.5786    | 0.8008        | 3.1117  | 0.1874   |
| Propensity score for baseline PPI use, deciles 6      | 6                    | 1.0804    | 0.4158        | 2.8073  | 0.8739   |
| Propensity score for baseline PPI use, deciles 5      | 5                    | 1.0847    | 0.4491        | 2.6196  | 0.8566   |
| Propensity score for baseline PPI use, deciles 4      | 4                    | 1.0832    | 0.4786        | 2.4511  | 0.8480   |
| Propensity score for baseline PPI use, deciles 3      | 3                    | 1.0729    | 0.5819        | 1.9783  | 0.8217   |
| Propensity score for baseline PPI use, deciles 2      | 2                    | 1.6107    | 0.8528        | 3.0421  | 0.1418   |
| Propensity score for baseline PPI use, deciles 1      | 1                    | 1.3329    | 0.6959        | 2.5531  | 0.3861   |
| Followup anticoagulant use 2: Former/indet user       | 2: Former/indet user | 1.3408    | 0.7406        | 2.4276  | 0.3329   |
| Followup anticoagulant use 1: Current user            | 1: Current user      | 3.4947    | 2.3996        | 5.0894  | 0.0000   |
| Followup corticosteroid use 2: Former/indet user      | 2: Former/indet user | 1.1153    | 0.8261        | 1.5058  | 0.4761   |
| Followup corticosteroid use 1: Current user           | 1: Current user      | 1.8994    | 1.0334        | 3.4912  | 0.0389   |
| Followup NSAID use and dose 3: Former/indet user      | 3: Former/indet user | 1.4803    | 0.9457        | 2.3172  | 0.0862   |
| Followup NSAID use and dose 2: Current, hi dose       | 2: Current, hi dose  | 1.9961    | 1.0617        | 3.7527  | 0.0319   |
| Followup NSAID use and dose 1: Current, low dose      | 1: Current, low dose | 1.7063    | 0.7314        | 3.9810  | 0.2164   |
| Followup coxib use and dose 3: Former/indet user      | 3: Former/indet user | 0.7533    | 0.3684        | 1.5402  | 0.4375   |
| Followup coxib use and dose 2: Current, hi dose       | 2: Current, hi dose  | 1.3520    | 0.8010        | 2.2819  | 0.2588   |
| Followup coxib use and dose 1: Current, low dose      | 1: Current, low dose | 1.0099    | 0.3213        | 3.1743  | 0.9866   |
| Followup GI/Trauma hosp (not endpoint) 2: <=90 days   | 2: <=90 days         | 1.5520    | 0.6555        | 3.6748  | 0.3176   |
| Followup GI/Trauma hosp (not endpoint) 1: 91-365 days | 1: 91-365 days       | 1.1489    | 0.4820        | 2.7384  | 0.7542   |
| Followup cardiovascular hosp 2: <=90 days             | 2: <=90 days         | 0.5236    | 0.2726        | 1.0055  | 0.0519   |
| Followup cardiovascular hosp 1: 91-365 days           | 1: 91-365 days       | 1.1216    | 0.6589        | 1.9094  | 0.6724   |
| Followup other hosp 2: <=90 days                      | 2: <=90 days         | 0.7361    | 0.3543        | 1.5297  | 0.4117   |
| Followup other hosp 1: 91-365 days                    | 1: 91-365 days       | 0.9137    | 0.6152        | 1.3569  | 0.6545   |
| Followup ED visit 2: <=90 days                        | 2: <=90 days         | 1.3719    | 0.9922        | 1.8969  | 0.0558   |
| Followup ED visit 1: 91-365 days                      | 1: 91-365 days       | 1.2323    | 0.8648        | 1.7560  | 0.2476   |
| Followup days in hospital past 90 days 4: 15+         | 4: 15+               | 4.6060    | 1.4243        | 14.8954 | 0.0108   |
| Followup days in hospital past 90 days 3: 7-14        | 3: 7-14              | 2.0859    | 0.7488        | 5.8106  | 0.1596   |
| Followup days in hospital past 90 days 2: 3-7         | 2: 3-7               | 2.4530    | 1.1418        | 5.2698  | 0.0215   |
| Followup days in hospital past 90 days 1: 1-2         | 1: 1-2               | 2.2249    | 0.9279        | 5.3346  | 0.0731   |
| Followup GI symptoms 1                                | 1                    | 2.1998    | 1.0028        | 4.8255  | 0.0492   |
| Followup low-dose aspirin 2: indet/former             | 2: indet/former      | 1.4370    | 0.8831        | 2.3383  | 0.1444   |
| Followup low-dose aspirin 1: current                  | 1: current           | 1.4879    | 1.0343        | 2.1405  | 0.0322   |
| Overall PPI use status changed from t0                |                      | 1.0855    | 0.6925        | 1.7014  | 0.7205   |
| Followup PPI use status 3: Current user PPI           | 3: Current user PPI  | 0.5026    | 0.3872        | 0.6524  | 0.0000   |



**Table A-5. Cox regression model results for serious cardiovascular disease endpoint. Shown are the hazard ratios (HRs), the 95% confidence intervals (CIs), and the p-value (p).**

|                                                            |                       | <i>HR</i> | <i>95% CI</i> |       | <i>p</i> |
|------------------------------------------------------------|-----------------------|-----------|---------------|-------|----------|
| Age in years, mean                                         |                       | 1.019     | 1.014         | 1.025 | 0.003    |
| Male, %                                                    |                       | 1.071     | 0.965         | 1.190 | 0.054    |
| Calendar year of cohort entry, mean 2005                   | 2005                  | 0.759     | 0.495         | 1.163 | 0.218    |
| Calendar year of cohort entry, mean 2004                   | 2004                  | 0.828     | 0.615         | 1.114 | 0.152    |
| Calendar year of cohort entry, mean 2003                   | 2003                  | 0.872     | 0.648         | 1.173 | 0.151    |
| Calendar year of cohort entry, mean 2002                   | 2002                  | 0.908     | 0.691         | 1.192 | 0.139    |
| Calendar year of cohort entry, mean 2001                   | 2001                  | 0.982     | 0.767         | 1.257 | 0.126    |
| Calendar year of cohort entry, mean 2000                   | 2000                  | 1.085     | 0.859         | 1.369 | 0.119    |
| White, %                                                   |                       | 0.942     | 0.820         | 1.084 | 0.071    |
| TennCare enrollment uninsured, %                           |                       | 0.830     | 0.728         | 0.948 | 0.067    |
| Clopidogrel/ticlopidene prior to te, %                     |                       | 1.323     | 1.150         | 1.522 | 0.072    |
| Qualifying hospitalization diagnosis 7: AMI, CABG          | 7: AMI, CABG          | 0.905     | 0.595         | 1.377 | 0.214    |
| Qualifying hospitalization diagnosis 6: AMI, Stent, DE     | 6: AMI, Stent, DE     | 1.541     | 1.051         | 2.261 | 0.195    |
| Qualifying hospitalization diagnosis 5: AMI, Stent, NDE    | 5: AMI, Stent, NDE    | 1.245     | 0.866         | 1.788 | 0.185    |
| Qualifying hospitalization diagnosis 4: AMI, Medical       | 4: AMI, Medical       | 2.311     | 1.825         | 2.927 | 0.121    |
| Qualifying hospitalization diagnosis 3: No AMI, CABG       | 3: No AMI, CABG       | 0.844     | 0.623         | 1.144 | 0.155    |
| Qualifying hospitalization diagnosis 2: No AMI, Stent, DE  | 2: No AMI, Stent, DE  | 0.817     | 0.595         | 1.121 | 0.162    |
| Qualifying hospitalization diagnosis 1: No AMI, Stent, NDE | 1: No AMI, Stent, NDE | 0.925     | 0.736         | 1.164 | 0.117    |
| Propensity score for baseline PPI use, deciles 9           | 9                     | 1.044     | 0.731         | 1.490 | 0.182    |
| Propensity score for baseline PPI use, deciles 8           | 8                     | 1.037     | 0.706         | 1.524 | 0.196    |
| Propensity score for baseline PPI use, deciles 7           | 7                     | 0.877     | 0.660         | 1.166 | 0.145    |
| Propensity score for baseline PPI use, deciles 6           | 6                     | 0.973     | 0.731         | 1.295 | 0.146    |
| Propensity score for baseline PPI use, deciles 5           | 5                     | 1.079     | 0.795         | 1.463 | 0.156    |
| Propensity score for baseline PPI use, deciles 4           | 4                     | 0.941     | 0.690         | 1.283 | 0.158    |
| Propensity score for baseline PPI use, deciles 3           | 3                     | 1.091     | 0.832         | 1.431 | 0.138    |
| Propensity score for baseline PPI use, deciles 2           | 2                     | 1.204     | 0.946         | 1.532 | 0.123    |
| Propensity score for baseline PPI use, deciles 1           | 1                     | 1.004     | 0.725         | 1.391 | 0.166    |

|                                                      |                     | <i>HR</i> | <i>95% CI</i> |       | <i>p</i> |
|------------------------------------------------------|---------------------|-----------|---------------|-------|----------|
| Followup GI hosp                                     |                     | 1.044     | 0.784         | 1.391 | 0.146    |
| Followup cardiovascular hosp (not endpoint)          |                     | 1.210     | 0.968         | 1.513 | 0.114    |
| Followup other hosp                                  |                     | 0.842     | 0.682         | 1.041 | 0.108    |
| Followup, time since last hosp 4: 1-14 days          | 4: 1-14 days        | 1.746     | 1.235         | 2.470 | 0.177    |
| Followup, time since last hosp 3: 15-29 days         | 3: 15-29 days       | 1.349     | 0.895         | 2.035 | 0.210    |
| Followup, time since last hosp 2: 30-90 days         | 2: 30-90 days       | 1.097     | 0.772         | 1.560 | 0.179    |
| Followup, time since last hosp 1: 91-365 days        | 1: 91-365 days      | 0.973     | 0.675         | 1.404 | 0.187    |
| Followup, ED in past 365 days                        |                     | 1.387     | 1.074         | 1.790 | 0.130    |
| Followup, Angioplasty                                |                     | 0.832     | 0.704         | 0.982 | 0.085    |
| Followup, Stent                                      |                     | 0.910     | 0.753         | 1.099 | 0.096    |
| Followup, CABG                                       |                     | 0.700     | 0.502         | 0.976 | 0.170    |
| Followup, new diagnosis heart failure                |                     | 1.591     | 1.363         | 1.857 | 0.079    |
| Followup, new diagnosis cerebrovascular disease      |                     | 1.230     | 1.073         | 1.410 | 0.070    |
| Followup, new diagnosis peripheral vascular disease  |                     | 1.399     | 1.099         | 1.780 | 0.123    |
| Followup, new digoxin start                          |                     | 1.473     | 1.170         | 1.855 | 0.117    |
| Followup, new loop diuretic start                    |                     | 1.080     | 0.904         | 1.291 | 0.091    |
| Followup, new insulin start                          |                     | 1.323     | 1.027         | 1.705 | 0.129    |
| followup, new calcium channel blocker start          |                     | 0.825     | 0.662         | 1.028 | 0.112    |
| Followup, low-dose aspirin past 365 days             |                     | 0.845     | 0.737         | 0.968 | 0.069    |
| Followup, statin in past 365 days                    |                     | 0.714     | 0.622         | 0.818 | 0.070    |
| Followup, in hospital 4+ days in past 90             |                     | 1.665     | 1.146         | 2.419 | 0.191    |
| Followup, days in hospital in past 365 5: 30+ days   | 5: 30+ days         | 2.186     | 1.482         | 3.224 | 0.198    |
| Followup, days in hospital in past 365 4: 15-30 days | 4: 15-30 days       | 1.719     | 1.165         | 2.536 | 0.198    |
| Followup, days in hospital in past 365 3: 7-14 days  | 3: 7-14 days        | 1.577     | 1.155         | 2.153 | 0.159    |
| Followup, days in hospital in past 365 2: 3-7 days   | 2: 3-7 days         | 1.290     | 0.971         | 1.715 | 0.145    |
| Overall PPI use status changed from t0               |                     | 1.119     | 0.926         | 1.351 | 0.096    |
| Followup PPI use status 3: Current user PPI          | 3: Current user PPI | 0.989     | 0.821         | 1.192 | 0.095    |

**Table A-6. Cohort members whose qualifying hospitalization included percutaneous coronary intervention with stenting. Risk of serious cardiovascular disease endpoints among current users of clopidogrel, according to concurrent use of proton-pump inhibitors (PPIs).\***

|                                                     | <i>No Concurrent PPI (5695 py)</i> | <i>Concurrent PPI (4457 py)</i> | <i>HR (95% CI)</i> | <i>p</i> |
|-----------------------------------------------------|------------------------------------|---------------------------------|--------------------|----------|
|                                                     | <i>N (Rate/1000 py)</i>            |                                 |                    |          |
| Serious cardiovascular disease                      | 296 (52.0)                         | 228 (51.2)                      | 1.01 (0.77-1.30)   | .98      |
| Acute myocardial infarction or sudden cardiac death | 219 (38.4)                         | 154 (34.6)                      | 1.00 (0.76-1.30)   | .97      |
| Stroke                                              | 43 (7.6)                           | 47 (10.5)                       | 0.97 (0.50-1.90)   | .94      |
| Other cardiovascular death                          | 34 (6.0)                           | 27 (6.1)                        | 1.22 (0.57-2.56)   | .61      |

\*HR = hazard ratio, adjusted for potential confounders. py = person-years, CI = confidence interval.

**Table A-7. Sensitivity analyses for serious cardiovascular disease endpoint.\***

|                                                                   | <i>All PPIs</i> |               | <i>Pantoprazole</i> |               | <i>Omeprazole</i> |               |
|-------------------------------------------------------------------|-----------------|---------------|---------------------|---------------|-------------------|---------------|
|                                                                   | <i>HR</i>       | <i>95% CI</i> | <i>HR</i>           | <i>95% CI</i> | <i>HR</i>         | <i>95% CI</i> |
| Primary analysis                                                  | 0.99            | 0.82-1.19     | 1.08                | 0.88-1.32     | 0.74              | 0.54-1.15     |
| <i>New users of clopidogrel, first year of followup**</i>         |                 |               |                     |               |                   |               |
| a. With time-dependent covariates                                 | 0.91            | 0.70-1.19     | 1.02                | 0.71-1.46     | 0.79              | 0.46-1.36     |
| b. No time-dependent covariates                                   | 0.91            | 0.72-1.15     | 0.94                | 0.70-1.28     | 0.88              | 0.54-1.43     |
| c. No time-dependent covariates, censored when PPI status changes | 0.92            | 0.72-1.18     | 0.97                | 0.69-1.36     | 0.88              | 0.55-1.43     |
| <i>Other users of clopidogrel</i>                                 |                 |               |                     |               |                   |               |
| a. With time-dependent covariates                                 | 0.99            | 0.81-1.22     | 1.08                | 0.87-1.35     | 0.78              | 0.50-1.22     |
| b. No time-dependent covariates                                   | 1.01            | 0.83-1.23     | 1.12                | 0.88-1.44     | 0.94              | 0.72-1.23     |
| c. No time-dependent covariates, censored when PPI status changes | 1.05            | 0.84-1.30     | 1.18                | 0.91-1.53     | 1.00              | 0.75-1.34     |
| Population comparable to VA study***                              | 1.03            | 0.68-1.56     | 1.04                | 0.67-1.61     | 0.63              | 0.32-1.26     |

\*PPI = Proton-pump inhibitor, HR = hazard ratio for serious cardiovascular disease comparing current users of PPIs to nonusers, adjusted for potential confounders. CI = confidence interval.

\*\*New users are defined as persons with no clopidogrel use prior to the qualifying hospital admission and who begin clopidogrel use within seven days of the qualifying hospital discharge. The model without time-dependent covariates uses PPI status as of  $t_0$ , the first day of clopidogrel use following the qualifying hospital discharge. One model censors person-time when PPI use status changes from that at baseline.

\*\*\*Males, 55 years of age or older, endpoint is serious cardiovascular disease or death from any cause, clopidogrel use began within seven days of the qualifying hospital discharge. See Ho and colleagues(11).

**Table A-8. Sensitivity analyses for gastroduodenal bleeding hospitalization endpoint.\***

|                                                                   | <i>All PPIs</i> |               | <i>Pantoprazole</i> |               | <i>Omeprazole</i> |               |
|-------------------------------------------------------------------|-----------------|---------------|---------------------|---------------|-------------------|---------------|
|                                                                   | <i>HR</i>       | <i>95% CI</i> | <i>HR</i>           | <i>95% CI</i> | <i>HR</i>         | <i>95% CI</i> |
| Primary analysis                                                  | 0.50            | 0.39-0.65     | 0.46                | 0.33-0.63     | 0.43              | 0.16-1.13     |
| <i>New users of clopidogrel, first year of followup**</i>         |                 |               |                     |               |                   |               |
| a. With time-dependent covariates                                 | 0.66            | 0.39-1.11     | 0.58                | 0.29-1.18     | 0.84              | 0.23-3.11     |
| b. No time-dependent covariates                                   | 0.73            | 0.44-1.20     | 0.57                | 0.27-1.22     | 0.67              | 0.15-3.00     |
| c. No time-dependent covariates, censored when PPI status changes | 0.75            | 0.46-1.25     | 0.58                | 0.27-1.26     | 0.72              | 0.16-3.27     |
| <i>Other users of clopidogrel</i>                                 |                 |               |                     |               |                   |               |
| a. With time-dependent covariates                                 | 0.45            | 0.32-0.62     | 0.42                | 0.31-0.56     | 0.25              | 0.06-1.00     |
| b. No time-dependent covariates                                   | 0.54            | 0.33-0.89     | 0.32                | 0.13-0.81     | 0.48              | 0.24-0.98     |
| c. No time-dependent covariates, censored when PPI status changes | 0.44            | 0.29-0.67     | 0.27                | 0.11-0.62     | 0.26              | 0.10-0.66     |
| Population comparable to VA study***                              | 0.61            | 0.26-1.42     | 0.30                | 0.09-0.96     | 0.55              | 0.39-5.68     |

\*PPI = Proton-pump inhibitor, HR = hazard ratio for serious cardiovascular disease comparing current users of PPIs to nonusers, adjusted for potential confounders. CI = confidence interval.

\*\*New users are defined as persons with no clopidogrel use prior to the qualifying hospital admission and who begin clopidogrel use within seven days of the qualifying hospital discharge. The model without time-dependent covariates uses PPI status as of  $t_0$ , the first day of clopidogrel use following the qualifying hospital discharge. One model censors person-time when PPI use status changes from that at baseline.

\*\*\*Males, 55 years of age or older, endpoint is serious cardiovascular disease or death from any cause, clopidogrel use began within seven days of the qualifying hospital discharge. See Ho and colleagues(11).

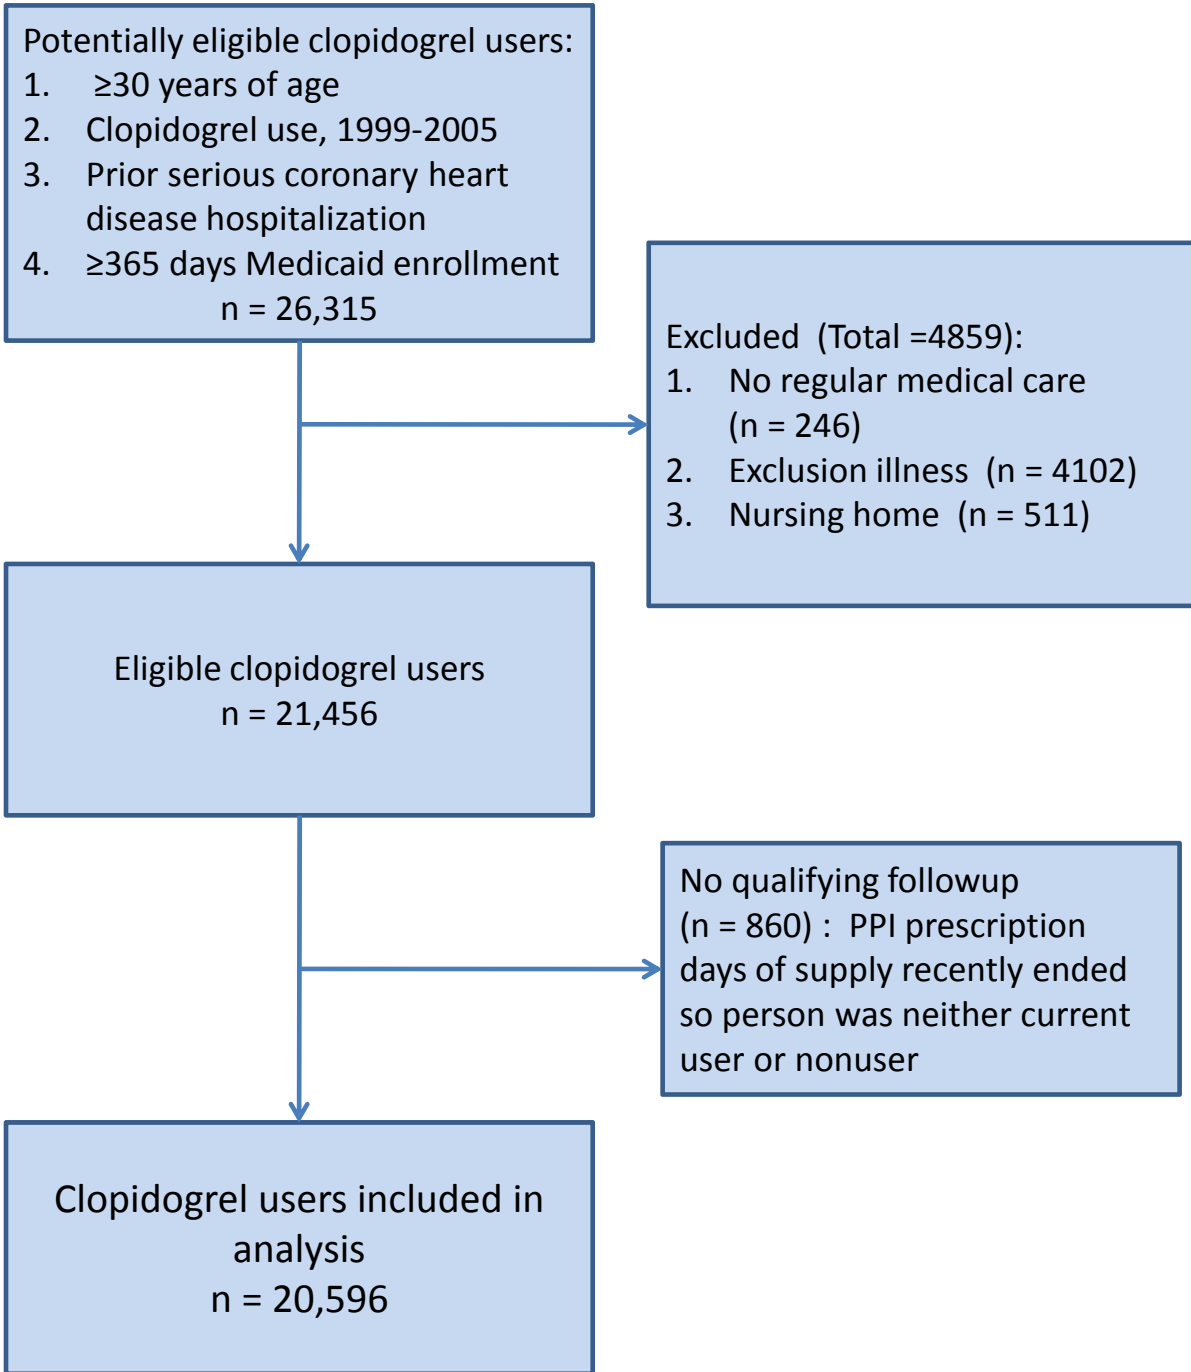

Figure A-1 Study Flow Diagram

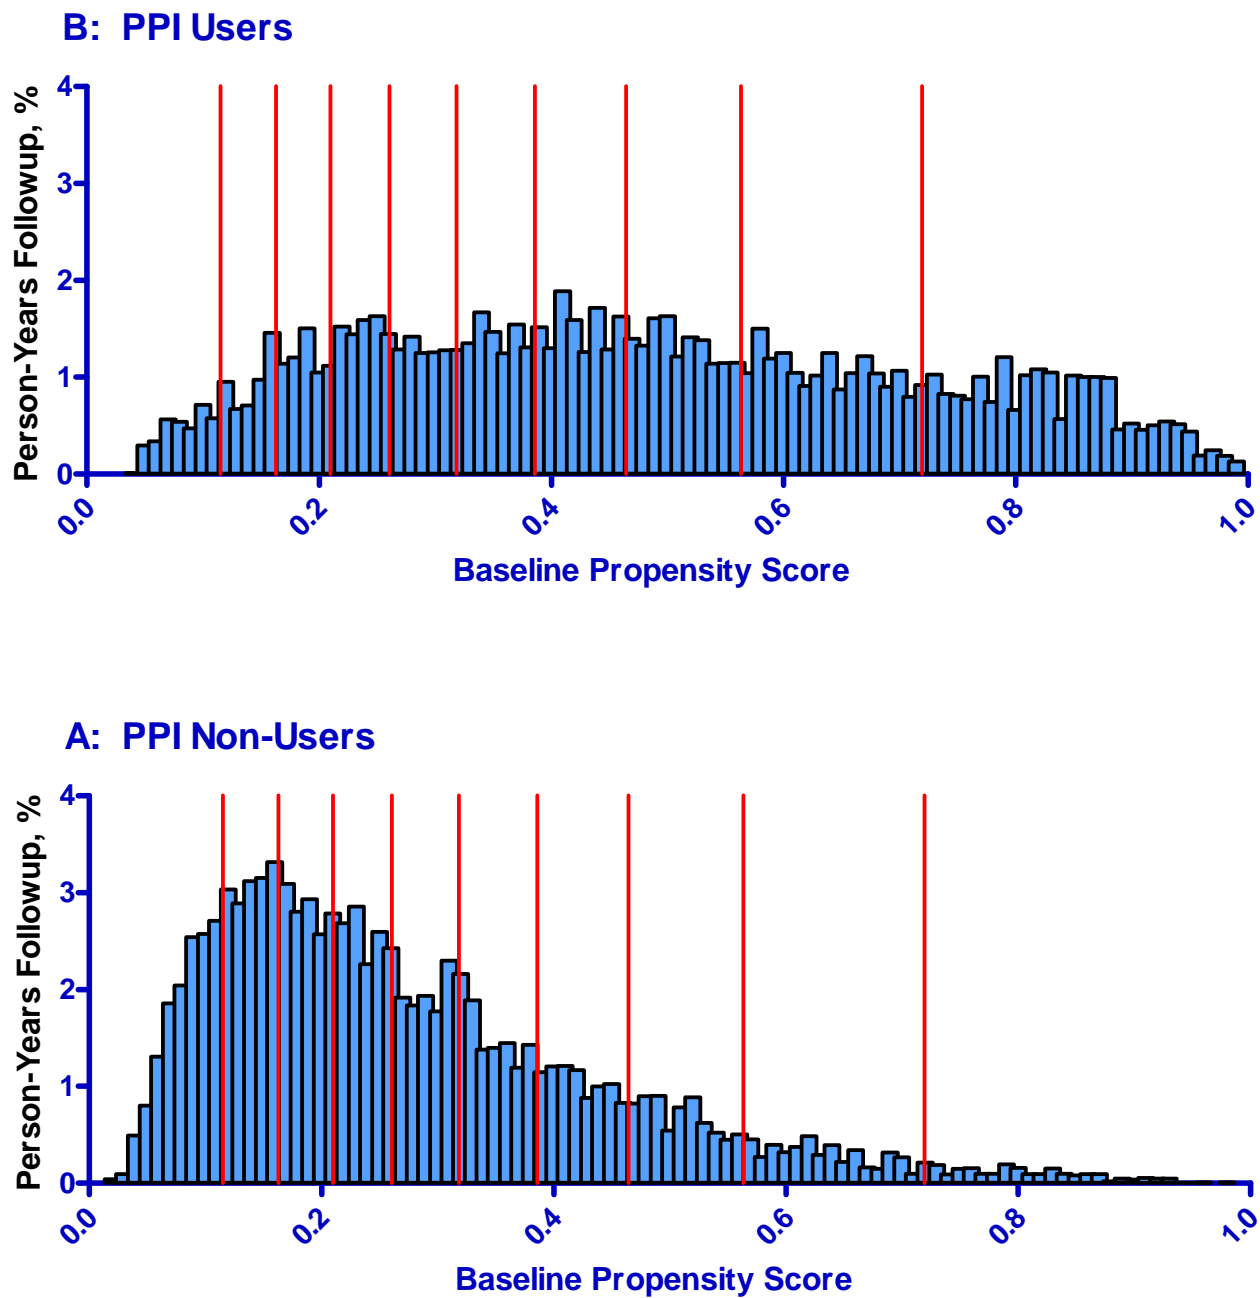

Figure A-2. Distribution of person years of followup according to baseline propensity score (probability of baseline PPI use), for baseline nonusers of PPIs (Panel A) and baseline users of PPIs (Panel B). Red vertical lines indicate deciles for the propensity score.

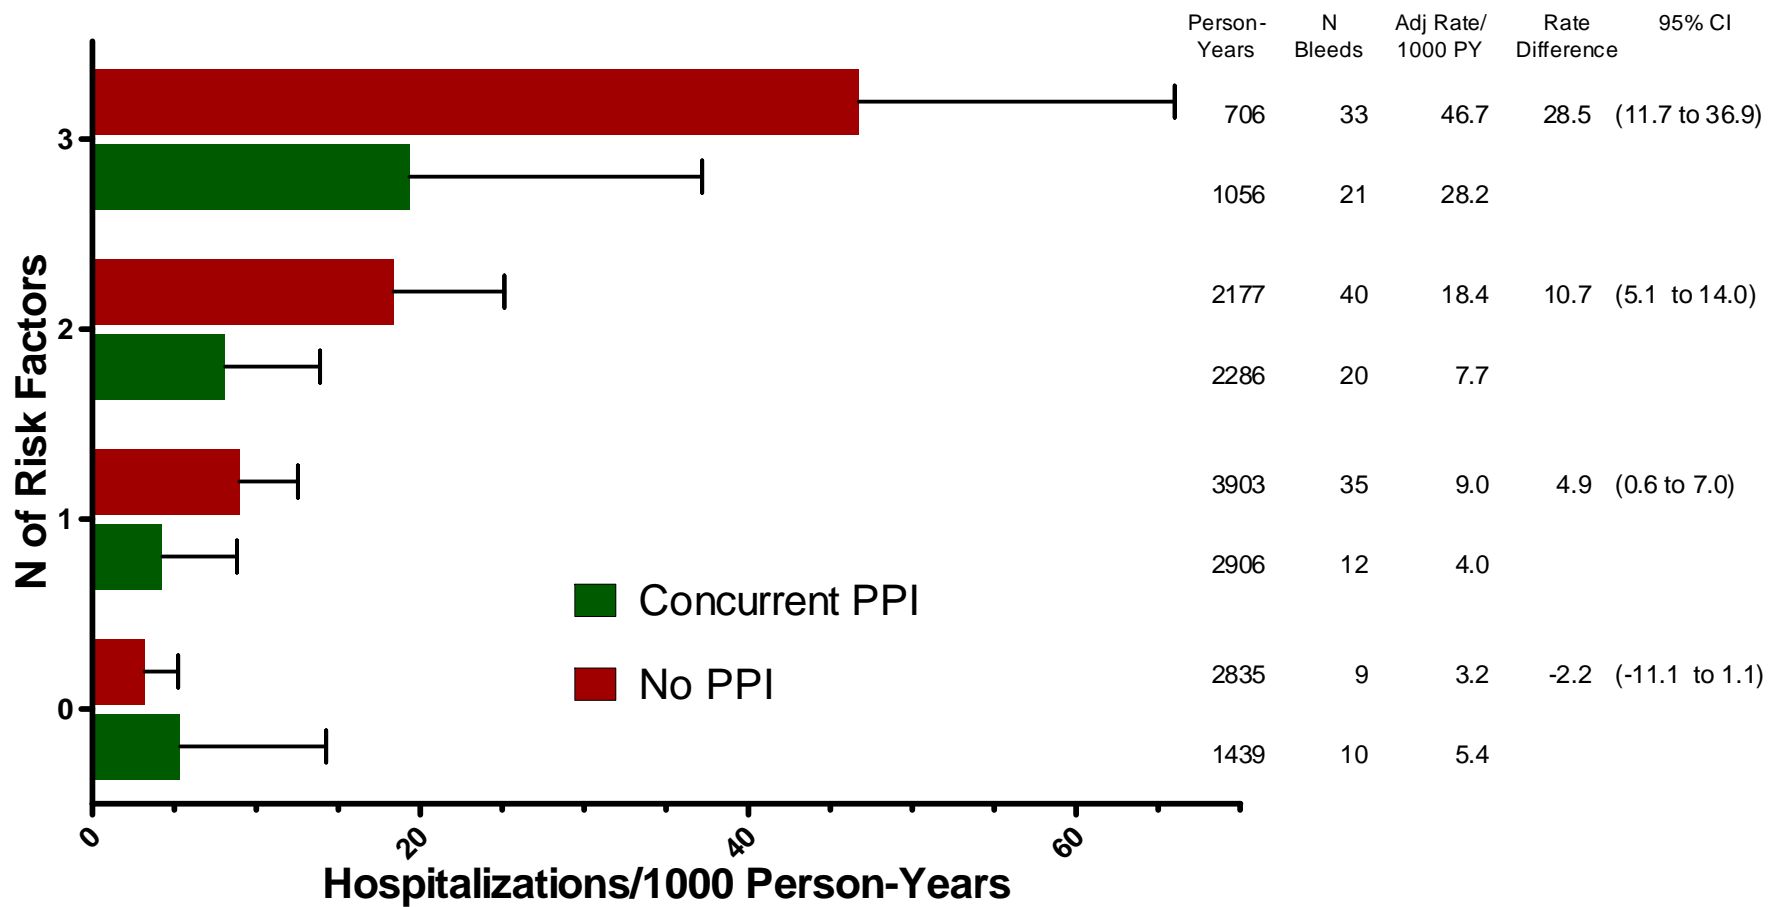

Figure A-3 Risk of gastroduodenal bleeding hospitalizations among current users of clopidogrel, according to concurrent use of proton-pump inhibitors (PPIs). 'Rate Difference' is for nonusers of PPIs versus current users and is adjusted for potential confounders. The individual risk factors are age 65 years or older, prior history of hospitalization for upper gastrointestinal disease or bleeding, recent use of anticoagulants, current use of other medications that increase bleeding risk (systemic corticosteroids, NSAIDs/coxibs), and any hospital discharge in the past year. CI denotes confidence interval.

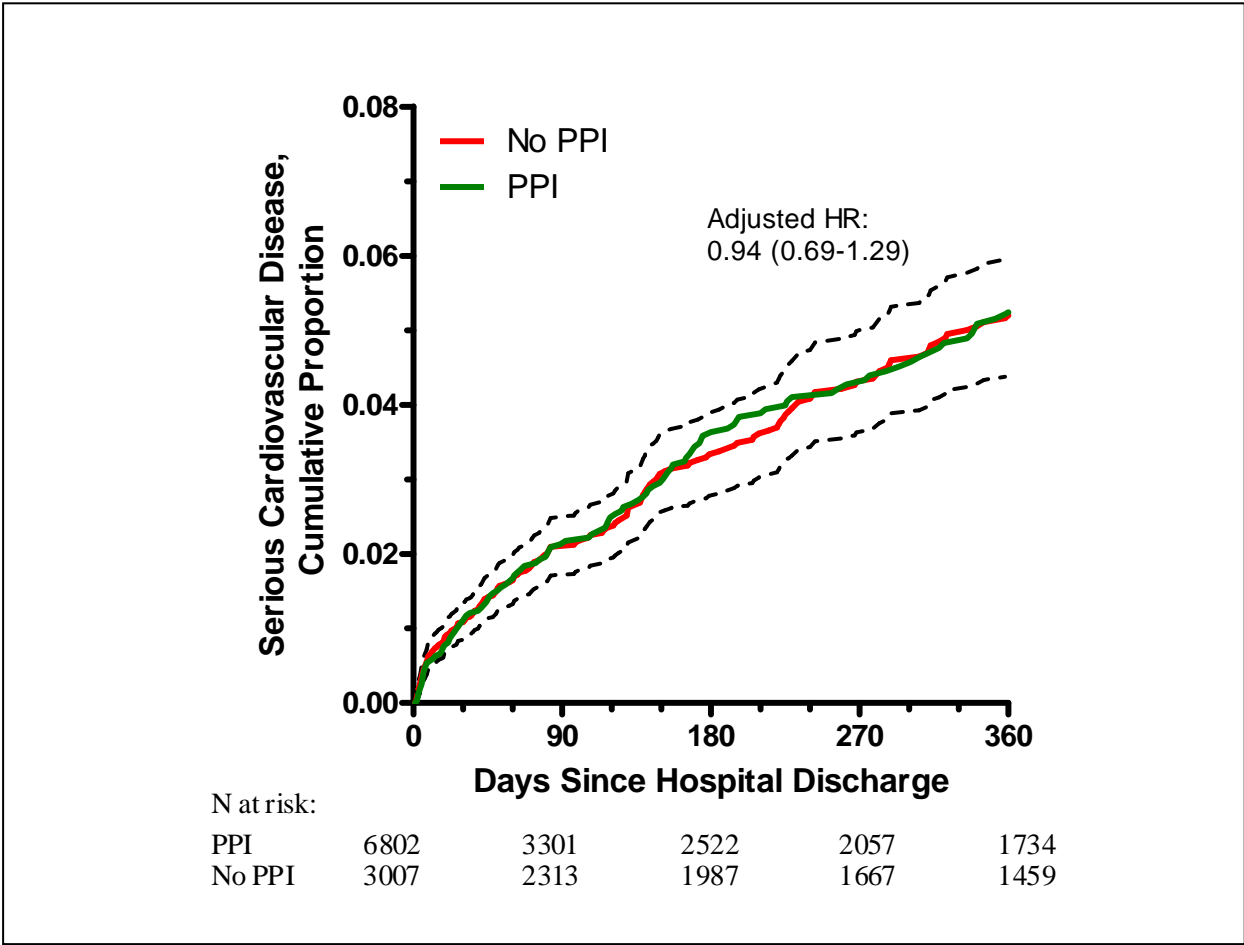

**Figure A-4. Risk of serious cardiovascular disease endpoint (nonfatal or fatal myocardial infarction, stroke, or other cardiovascular death) in current clopidogrel users who had had a percutaneous coronary intervention with stenting, according to concurrent PPI use status. Figure shows unadjusted cumulative proportions with serious cardiovascular disease. The dashed line is the 95% confidence interval for the PPI nonuser group. Both clopidogrel and PPI use status could change on each day of followup; thus, the cumulative proportions were calculated using the method of Simon and Makuch.(44) HR is the adjusted hazard ratio, with the 95% confidence interval in parentheses.**
